# Supplementary material
Source: PubMed Central journal article supplement (PMC2040927)
Supplement: pnas_0704733104_2.pdf [file pnas_0704733104_2.pdf]

**Table 3. Partial purification of the glyoxysomal processing protease (GPP)**

| Fraction           | Total activity<br>(RFU) | Total protein<br>(mg) | Specific activity<br>(RFU/mg) | Yield<br>(%) | Purification factor |
|--------------------|-------------------------|-----------------------|-------------------------------|--------------|---------------------|
| Glyoxysome extract | $63 \times 10^6$        | 190                   | $33.2 \times 10^4$            | 100          | 1.0                 |
| DEAE               | $61 \times 10^6$        | 15                    | $4.1 \times 10^6$             | 97           | 12.3                |
| Superdex75         | $37 \times 10^6$        | 1                     | $37 \times 10^6$              | 59           | 111.5               |
| Hydroxyapatite     | $7 \times 10^6$         | 0.3                   | $23 \times 10^6$              | 11           | 69.3                |
| MonoQ              | $3 \times 10^6$         | 0.03                  | $100 \times 10^6$             | 4.8          | 301.2               |

Protease activity (RFUs) was estimated with the fluorogenic substrate Cbz-FR-AMC.
