# Supplementary material
Source: PubMed Central journal article supplement (PMC2040927)
Supplement: pnas_0704733104_3.pdf [file pnas_0704733104_3.pdf]

**Table 4. Fluorogenic peptides for functional analysis of the glyoxysomal processing protease (GPP)**

| Fluorogenic peptide    | Sequence                                            | M <sub>r</sub> (Da) |
|------------------------|-----------------------------------------------------|---------------------|
| gCS                    | Abz-EAHCV→ <sup>1</sup> SAQTM-(NO <sub>2</sub> )Y-D | 1518.6              |
| gMDH                   | Abz-RANCR→ <sup>1</sup> AKGGA-(NO <sub>2</sub> )Y-D | 1445.5              |
| Thiolase               | Abz-SASVC→ <sup>1</sup> AAGDS-(NO <sub>2</sub> )Y-D | 1309.3              |
| Control (thiolase-C/G) | Abz-SASVG→ <sup>1</sup> AAGDS-(NO <sub>2</sub> )Y-D | 1263.2              |

Abz, anthranilic acid as fluorogene (donor: excitation 320 nm, emission 420 nm); (NO<sub>2</sub>)Y, *m*-nitro-tyrosine as quencher (acceptor).

→<sup>1</sup>, Predicted cleavage site for GPP.
