# Supplementary material
Source: PubMed Central journal article supplement (PMC2040927)
Supplement: pnas_0704733104_4.pdf [file pnas_0704733104_4.pdf]

**Table 5. DEG15-like proteases in various organisms**

| <u>Organism</u>                | <u>Name</u> | <u>Accession</u> | <u>aa</u> | <u>PTS1</u> |     |
|--------------------------------|-------------|------------------|-----------|-------------|-----|
| <i>Arabidopsis thaliana</i>    | DEG15       | NP_174153        |           | 709         | Yes |
| <i>Oryza sativa</i>            | DEG15       | 11975.t03718     | 722       | Yes         |     |
| <i>Drosophila melanogaster</i> | CG3589-PA   | NP_611968        |           | 509         | Yes |
| <i>Danio rerio</i>             |             | XP_690168        |           | 521         | Yes |
| <i>Mus musculus</i>            | TYSND1      | XP_911089        |           | 568         | Yes |
| <i>Rattus norvegicus</i>       | TYSND1      | XP_345107        |           | 561         | Yes |
| <i>Homo sapiens</i>            | TYSND1      | CAI13685         | 566       | Yes         |     |

Name, annotated name at National Center for Biotechnology Information; Accession, protein accession number; aa, predicted length in amino acids.
