# Supplementary material
Source: PubMed Central journal article supplement (PMC2040927)
Supplement: pnas_0704733104_5.pdf [file pnas_0704733104_5.pdf]

```

Ath_Deg15 MDVSKVVSF SRNF AVL VK VEG PD PK GL KM RK HAF HQY HSG NAT LS AS GILL PR DI FL SGE
Osa_DEG15 MAPREVA AAA ARG FS AM AR IV GP DP KA VK MR RH AF HL HQ SG ST LS AS ALL LPP G SL AE PP
Cons * : * . : : * . * : . : . : : * * * * * . : * * * : * * * * * : : * * . : * * * * * . : * * * . : .

Ath_Deg15 -VAAKVLFEAGQDMALVLTVASVVEPFLTLGHR TSSSISQDPVKLIPGAMIEIMVEGQLK
Osa_DEG15 PLLDRICAAHG HAGG VAL TSASLVEPFLVEEQRN SPSQELQP-RLVPEAHL DVLVEHEES
Cons : : : * : . : . * * * * : * * * * * . : * . * . * . : * : * : * * . : : : * * : .

Ath_Deg15 -----SEKESPFWVPAQLLSLVDVPVSSAALQSLIE-ASSGSKDSGWDIGWSLVSAANGS
Osa_DEG15 RNIGGGKTGAPRWLSARLLAIVDVQASADSVLSLLQHEGSLIRSSSWDVCWSSLADV--NQ
Cons . : . : * * : . * : * * : : * * * . * : : : * * : : . * : . * . * * : * * * . . . .

Ath_Deg15 QPSINIEHYSKPLMQLD---EPHNANFMAKSATRMAILGVP-LSLLGQPSMNFASSSSKG
Osa_DEG15 KQVDNDARYSLECNRKNAYAESTEPMLAKSATRIAILGVSNLNSSNTRCINVSLMQQRG
Cons : * : * * : : * . : . : : * * * * * : * * * * * . * . . . : * . : . : *

Ath_Deg15 DTLVALGSPFGILSPVNFNSVSTGSIANSYPSGSLKKSLMIADVRC LPMEGAPVFAKN
Osa_DEG15 DSLLIMGSPFGILSPVHFFNSISVGVVANCLPPGTARSSLLMADVHCLPMEGAPVFDKN
Cons * : * : : * * * * * * * * * * : * * * * : * . * : * * . * . * : : . * * : : * * * : * * * * * * * * * * * *

Ath_Deg15 GHLIGILIRPLRQKNSGVEIQLVVPWGAI TTACSHLLLEE----PS--VEGKAS--QWGS
Osa_DEG15 SCLVGMLMKPLRQRGSSTEVLQVITWDAICNAWNSDKLERIGHPPSELVDDKSSDCKYKE
Cons . * : * : * : : * * * * : . * . . * : * * * : . * . * * . * . * * . * * . * * * : . * : * : : .

Ath_Deg15 EVL-----SVKSDASIPAQVAIEKAMESVCLITVNDGVWASGII LNEHGLILTNA
Osa_DEG15 SCVADKHRRFVPNSANNLNQYDVSPSLTEAISSVVLVTVSETS WSGIILNKNGLIMTNA
Cons . : * . : . . . . : : : * : . * * * : * * * . : * * * * * * * * : : * * * : * * *

Ath_Deg15 H L L E P W R Y G K G G V Y G E G F K P Y V L G A E E F S S T G S K F W E Q K S Q T L P R K A P R N H Y S S V G E N I R
Osa_DEG15 H L L E P W R F G R T S P L G -- L Q N K I A S F S E H I C G G ---- E N N L L Q P Q Q C K V S N E D A V K H E L S
Cons * * * * * * * * : * : . * : : : . . * . . * : : . * : : . : . : * . : :

Ath_Deg15 E Y K H N F L Q T G H R D I R V R L C H L D S W T W C P A N V V Y I C K E Q L D I A L L Q L E Y V P G K L Q P I T A N F
Osa_DEG15 L F -- N F G L K K D R A I S V R L D H G E R K T W C N A S V V F I S K G P L D V A L L Q M E K T P I E L C A I R P E F
Cons : * * . . * * * * * * : * * * * * . * * * : * . * * * : * * * * * : * . * : * . * . : *

Ath_Deg15 S S P P L G T T A H V V G H G L F G P R C G L S P S I C S G V V A K V V H A K R R L N T Q S --- I S Q E V A E F P A M
Osa_DEG15 V C P T A G S S V Y V V G H G L L G P R S G L S S S L S S G V V S K I V K I P S T Q H S Q L S S V V E V N N M D I P V M
Cons . * . * : : . : * * * * * * : * * * . * * * . * : . * * * * : * : * : : * * . : : . : : * . *

Ath_Deg15 L E T T A A V H P G G S G G A V L N S S G H M I G L V T S N A R H G A G T V I P H L N F S I P C A V L A P I F K F A E D
Osa_DEG15 L Q T T A A V H P G A S G G V L L D S L G R M V G L I T S N A K H G G G S T I P H L N F S I P C K S L E M V F K Y S A -
Cons * : * * * * * * * * . * * * . : * : * * : * : * : * * * * : * * . * : . * * * * * * * * * * * * * * : * * : :

Ath_Deg15 M Q N T T I L Q T L D Q P S E E L S S I W A L M P S L S P K T E Q S L P N L P K L L K D G N N K Q T K G S Q F A K F I A
Osa_DEG15 K G D F K I L E Q L D K P N E V L S S V W A L A P T S S P F F S T S ----- P E N G R G G K V L E F S K F L A
Cons : . * * : * * : * . * * * : * * * * : * * . * * . * . * . : * : * . * : * : * * : *

Ath_Deg15 E T Q D M F V K P T K L S --- R D V I P S K L
Osa_DEG15 D K Q E G L K S I K D I E A F L R D R I P S K I
Cons : . * : : . . : . . * * * * * :

```
